# Supplementary material for: Integrating analysis reveals microRNA-mediated pathway crosstalk among Crohn's disease, ulcerative colitis and colorectal cancer
Source: Royal Society of Chemistry journal article supplement (doi:10.1039/c4mb00169a), 2014-05-07
Supplement: c4mb00169a1.pdf [file c4mb00169a1.pdf]

## Supplementary Information

### **Integrating analysis reveals microRNA-mediated pathway crosstalk among Crohn's disease, ulcerative colitis and colorectal cancer**

Jing Bai<sup>†</sup>, Yongsheng Li<sup>†</sup>, Tingting Shao, Zheng Zhao, Yuan Wang, Aiwei Wu, Hong Chen, Shengli Li, Chunjie Jiang, Juan Xu\* and Xia Li\*

College of Bioinformatics Science and Technology, Harbin Medical University,  
Harbin 150080, China

#### **Content**

|                                                                                          |    |
|------------------------------------------------------------------------------------------|----|
| Figure S1. The relationships of risk genes in different diseases .....                   | 2  |
| Figure S2. Regulation network of risk miRNAs enriched in diseases .....                  | 3  |
| Figure S3. The statistic of validated and predicted miRNA targets.....                   | 4  |
| Table S1: The list of common biological processes among CD, UC and CRC.....              | 5  |
| Table S2. The list of consensus KEGG pathways among CD, UC and CRC.....                  | 12 |
| Table S3. The PubMed citation information of risk miRNAs and corresponding diseases..... | 13 |

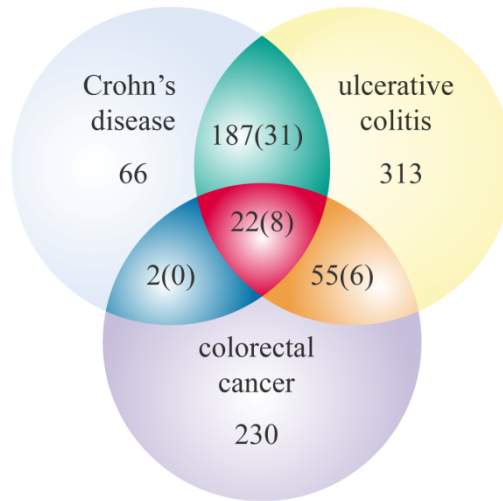

**Figure S1. The relationships of risk genes in different diseases**

Venn diagram illustrates the overlapping relationships of the risk genes among the three diseases. The number in the bracket represents the number of known disease genes of inflammatory bowel disease or colon cancer.

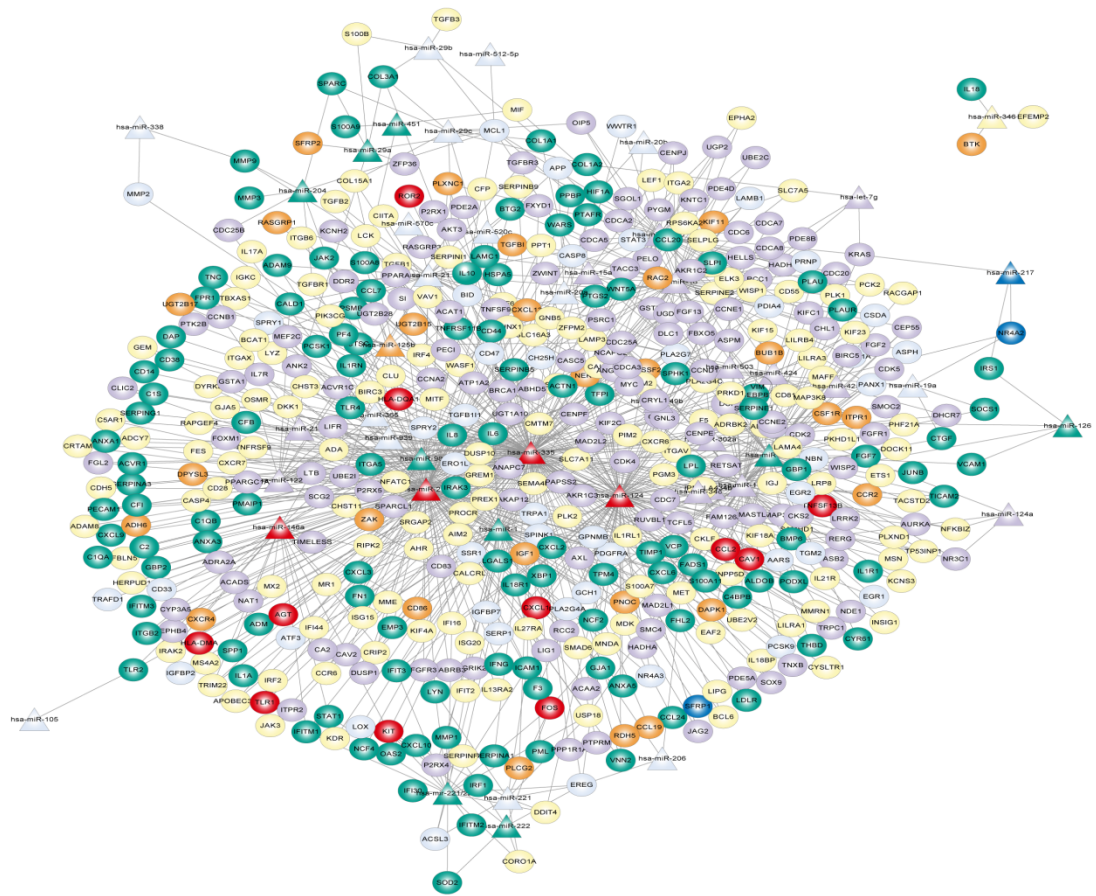

**Figure S2. Regulation network of risk miRNAs enriched in diseases**

A network generated by disease risk miRNAs and their validated target genes, which consists of 942 regulatory relationships between 47 miRNAs and 516 disease risk genes. A triangle node represents a miRNA and a circle node represents a gene. Colors of the nodes have the same meanings as the Venn diagram in Figure S1.

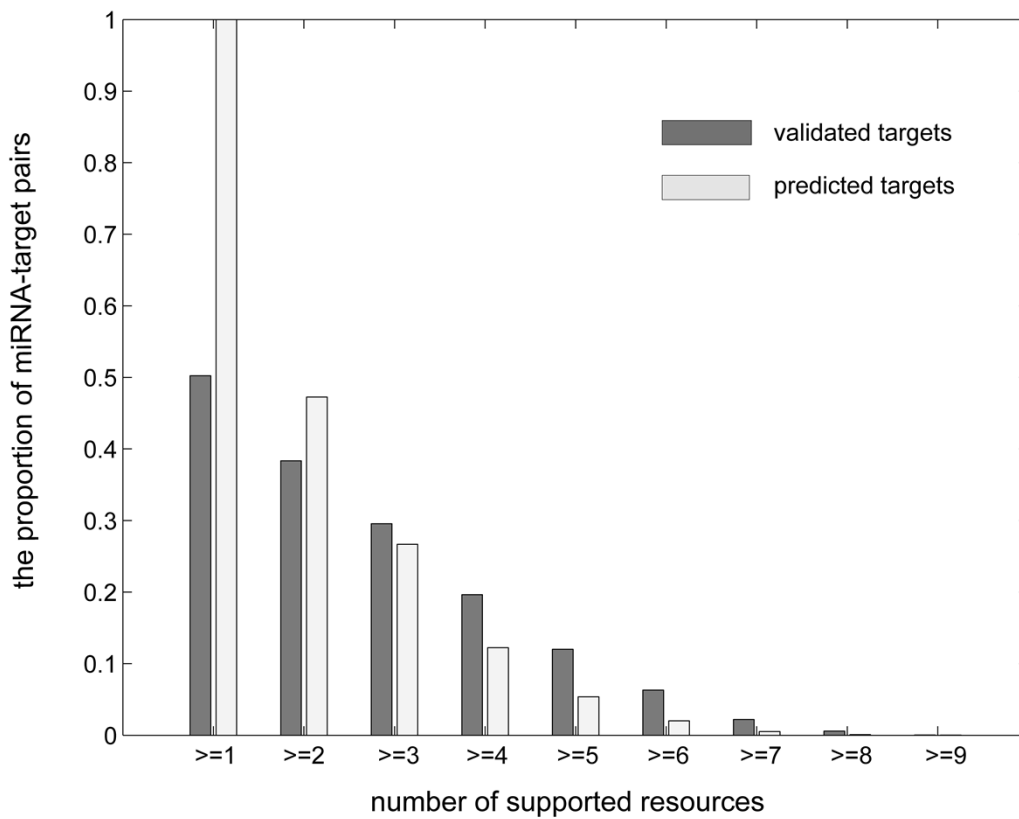

**Figure S3. The statistic of validated and predicted miRNA targets.**

The validated targets were collected from four considered sources including miRecords, TarBase\_v6.0, miRTarBase and mir2Disease, whereas the predicted targets were obtained from ten frequently-used databases including TargetScan, miRanda, PITA, DIANA-microT, PicTar5, RNA22, mirSVR, RNAhybrid, MirTarget2 and TargetMiner. The value is the proportion of shared miRNA-targets relative to the total number of miRNA-targets.

**Table S1: The list of common biological processes among CD, UC and CRC**

| <b>Classes</b> | <b>Term name1</b>                   | <b>Term name2</b>                                  | <b>No.1</b> | <b>No.2</b> |
|----------------|-------------------------------------|----------------------------------------------------|-------------|-------------|
| CD&UC          | response to organic cyclic compound | response to organic cyclic compound                | 7           | 5           |
|                | response to lipopolysaccharide      | response to lipopolysaccharide                     | 7           | 9           |
|                | response to lipopolysaccharide      | defense response to bacterium                      | 7           | 5           |
|                | response to lipopolysaccharide      | response to biotic stimulus                        | 7           | 5           |
|                | response to cytokine stimulus       | response to organic substance                      | 7           | 6           |
|                | response to cytokine stimulus       | cytokine-mediated signaling pathway                | 7           | 6           |
|                | response to cytokine stimulus       | response to tumor necrosis factor                  | 7           | 5           |
|                | response to cytokine stimulus       | response to cytokine stimulus                      | 7           | 5           |
|                | response to hyperoxia               | response to hypoxia                                | 7           | 5           |
|                | response to glucocorticoid stimulus | response to glucocorticoid stimulus                | 7           | 5           |
|                | response to glucocorticoid stimulus | response to estradiol stimulus                     | 7           | 5           |
|                | response to organic substance       | response to organic substance                      | 6           | 6           |
|                | response to organic substance       | response to cytokine stimulus                      | 6           | 5           |
|                | cellular component movement         | cellular component movement                        | 6           | 7           |
|                | cellular component movement         | positive regulation of cellular component movement | 6           | 6           |
|                | cellular component movement         | leukocyte migration                                | 6           | 6           |
|                | chemotaxis                          | chemotaxis                                         | 6           | 8           |
|                | inflammatory response               | blood coagulation                                  | 6           | 8           |
|                | inflammatory response               | inflammatory response                              | 6           | 8           |
|                | inflammatory response               | negative regulation of inflammatory response       | 6           | 6           |
|                | inflammatory response               | response to wounding                               | 6           | 6           |
|                | inflammatory response               | defense response                                   | 6           | 5           |
|                | response to cold                    | response to cold                                   | 6           | 5           |
|                | wound healing                       | blood coagulation                                  | 6           | 8           |
|                | wound healing                       | inflammatory response                              | 6           | 8           |

|                                                        |                                                        |   |   |
|--------------------------------------------------------|--------------------------------------------------------|---|---|
| wound healing                                          | response to wounding                                   | 6 | 6 |
| response to wounding                                   | blood coagulation                                      | 6 | 8 |
| response to wounding                                   | inflammatory response                                  | 6 | 8 |
| response to wounding                                   | response to wounding                                   | 6 | 6 |
| response to estradiol stimulus                         | response to glucocorticoid stimulus                    | 6 | 5 |
| response to estradiol stimulus                         | response to estradiol stimulus                         | 6 | 5 |
| negative regulation of cell proliferation              | cell proliferation                                     | 6 | 7 |
| negative regulation of cell proliferation              | negative regulation of cell proliferation              | 6 | 5 |
| leukocyte migration                                    | cellular component movement                            | 5 | 7 |
| leukocyte migration                                    | leukocyte migration                                    | 5 | 6 |
| cellular response to interleukin-1                     | response to interleukin-1                              | 5 | 5 |
| response to hydrogen peroxide                          | hydrogen peroxide catabolic process                    | 5 | 5 |
| anti-apoptosis                                         | negative regulation of apoptosis                       | 5 | 6 |
| anti-apoptosis                                         | anti-apoptosis                                         | 5 | 5 |
| positive regulation of cell migration                  | cellular component movement                            | 5 | 7 |
| positive regulation of cell migration                  | positive regulation of cellular component movement     | 5 | 6 |
| cellular response to tumor necrosis factor             | response to tumor necrosis factor                      | 5 | 5 |
| positive regulation of peptidyl-serine phosphorylation | positive regulation of peptidyl-serine phosphorylation | 5 | 5 |
| response to bacterium                                  | response to lipopolysaccharide                         | 5 | 9 |
| response to bacterium                                  | response to virus                                      | 5 | 6 |
| response to bacterium                                  | defense response to Gram-positive bacterium            | 5 | 5 |
| response to bacterium                                  | defense response to bacterium                          | 5 | 5 |
| response to bacterium                                  | response to biotic stimulus                            | 5 | 5 |
| response to interleukin-1                              | response to interleukin-1                              | 5 | 5 |
| positive regulation of inflammatory response           | inflammatory response                                  | 5 | 8 |
| positive regulation of                                 | negative regulation of                                 | 5 | 6 |

|                                                 |                                                 |   |   |
|-------------------------------------------------|-------------------------------------------------|---|---|
| inflammatory response                           | inflammatory response                           |   |   |
| innate immune response                          | immune response                                 | 5 | 8 |
| innate immune response                          | regulation of immune response                   | 5 | 6 |
| innate immune response                          | innate immune response                          | 5 | 6 |
| innate immune response                          | defense response                                | 5 | 5 |
| aging                                           | aging                                           | 5 | 5 |
| response to drug                                | response to drug                                | 5 | 5 |
| negative regulation of apoptosis                | positive regulation of cell death               | 5 | 6 |
| negative regulation of apoptosis                | negative regulation of apoptosis                | 5 | 6 |
| negative regulation of apoptosis                | positive regulation of apoptosis                | 5 | 5 |
| negative regulation of apoptosis                | anti-apoptosis                                  | 5 | 5 |
| negative regulation of apoptosis                | apoptosis                                       | 5 | 5 |
| positive regulation of cell proliferation       | cell proliferation                              | 5 | 7 |
| positive regulation of cell proliferation       | negative regulation of cell proliferation       | 5 | 5 |
| response to electrical stimulus                 | response to electrical stimulus                 | 5 | 5 |
| cytokine-mediated signaling pathway             | cytokine-mediated signaling pathway             | 5 | 6 |
| cytokine-mediated signaling pathway             | response to cytokine stimulus                   | 5 | 5 |
| acute-phase response                            | inflammatory response                           | 5 | 8 |
| endoplasmic reticulum unfolded protein response | endoplasmic reticulum unfolded protein response | 5 | 5 |
| response to hypoxia                             | response to hypoxia                             | 5 | 5 |
| acute inflammatory response                     | inflammatory response                           | 5 | 8 |
| protein secretion                               | positive regulation of cytokine secretion       | 5 | 6 |
| protein secretion                               | negative regulation of cytokine secretion       | 5 | 5 |
| activation of caspase activity                  | negative regulation of endopeptidase activity   | 5 | 8 |
| activation of caspase activity                  | activation of caspase activity                  | 5 | 6 |
| activation of caspase                           | negative regulation of                          | 5 | 6 |

|                                                   |                                                        |   |   |
|---------------------------------------------------|--------------------------------------------------------|---|---|
| activity                                          | caspase activity                                       |   |   |
| defense response to Gram-positive bacterium       | defense response to Gram-positive bacterium            | 5 | 5 |
| defense response to Gram-positive bacterium       | defense response to bacterium                          | 5 | 5 |
| platelet activation                               | blood coagulation                                      | 4 | 8 |
| platelet activation                               | response to wounding                                   | 4 | 6 |
| positive regulation of endothelial cell migration | positive regulation of cellular component movement     | 4 | 6 |
| blood coagulation                                 | blood coagulation                                      | 4 | 8 |
| blood coagulation                                 | inflammatory response                                  | 4 | 8 |
| blood coagulation                                 | response to wounding                                   | 4 | 6 |
| cellular response to lipopolysaccharide           | response to lipopolysaccharide                         | 4 | 9 |
| neutrophil chemotaxis                             | leukocyte migration                                    | 4 | 6 |
| cellular response to hydrogen peroxide            | hydrogen peroxide catabolic process                    | 4 | 5 |
| positive regulation of cell death                 | positive regulation of cell death                      | 4 | 6 |
| positive regulation of cell death                 | negative regulation of apoptosis                       | 4 | 6 |
| positive regulation of cell death                 | induction of apoptosis                                 | 4 | 5 |
| positive regulation of cell death                 | positive regulation of apoptosis                       | 4 | 5 |
| positive regulation of cell death                 | apoptosis                                              | 4 | 5 |
| negative regulation of endopeptidase activity     | negative regulation of endopeptidase activity          | 4 | 8 |
| negative regulation of endopeptidase activity     | activation of caspase activity                         | 4 | 6 |
| negative regulation of endopeptidase activity     | negative regulation of caspase activity                | 4 | 6 |
| positive regulation of protein phosphorylation    | positive regulation of peptidyl-serine phosphorylation | 4 | 5 |
| immune response                                   | immune response                                        | 4 | 8 |
| immune response                                   | regulation of immune response                          | 4 | 6 |
| immune response                                   | innate immune response                                 | 4 | 6 |
| cell-cell signaling                               | cell-cell signaling                                    | 4 | 7 |
| cell-cell signaling                               | signal transduction                                    | 4 | 6 |
| cellular response to                              | cellular response to glucose                           | 4 | 5 |



|        |                                                                |                                                                |   |   |
|--------|----------------------------------------------------------------|----------------------------------------------------------------|---|---|
|        | glucose stimulus                                               | stimulus                                                       |   |   |
|        | hydrogen peroxide catabolic process                            | superoxide anion generation                                    | 4 | 6 |
|        | hydrogen peroxide catabolic process                            | hydrogen peroxide catabolic process                            | 4 | 5 |
|        | inner ear development                                          | inner ear development                                          | 4 | 5 |
|        | fatty acid biosynthetic process                                | leukotriene biosynthetic process                               | 4 | 5 |
|        | positive regulation of membrane protein ectodomain proteolysis | positive regulation of membrane protein ectodomain proteolysis | 4 | 5 |
|        | response to copper ion                                         | response to copper ion                                         | 4 | 5 |
|        | response to heat                                               | response to cold                                               | 4 | 5 |
|        | hemopoiesis                                                    | erythrocyte differentiation                                    | 4 | 6 |
|        | hemopoiesis                                                    | hemopoiesis                                                    | 4 | 5 |
|        | calcium ion homeostasis                                        | elevation of cytosolic calcium ion concentration               | 4 | 6 |
|        | positive regulation of caspase activity                        | negative regulation of endopeptidase activity                  | 4 | 8 |
|        | positive regulation of caspase activity                        | activation of caspase activity                                 | 4 | 6 |
|        | positive regulation of caspase activity                        | negative regulation of caspase activity                        | 4 | 6 |
|        | response to tumor necrosis factor                              | response to tumor necrosis factor                              | 4 | 5 |
|        | response to tumor necrosis factor                              | response to cytokine stimulus                                  | 4 | 5 |
|        | NF-kappaB cascade                                              | NF-kappaB cascade                                              | 4 | 5 |
|        | positive regulation of tumor necrosis factor production        | positive regulation of tumor necrosis factor production        | 4 | 5 |
|        | positive regulation of interleukin-6 production                | negative regulation of interleukin-6 production                | 4 | 5 |
|        | positive regulation of interleukin-1 beta secretion            | positive regulation of cytokine secretion                      | 4 | 6 |
|        | positive regulation of interleukin-1 beta secretion            | negative regulation of cytokine secretion                      | 4 | 5 |
| UC&CRC | blood coagulation                                              | platelet activation                                            | 8 | 3 |
|        | cell proliferation                                             | regulation of cell proliferation                               | 7 | 3 |
|        | cell proliferation                                             | cell proliferation                                             | 7 | 3 |
|        | cell-cell signaling                                            | signal transduction                                            | 7 | 3 |

|        |                                                  |                                                           |   |   |
|--------|--------------------------------------------------|-----------------------------------------------------------|---|---|
|        | signal transduction                              | signal transduction                                       | 6 | 3 |
|        | response to wounding                             | platelet activation                                       | 6 | 3 |
|        | cytokine-mediated signaling pathway              | cellular response to hormone stimulus                     | 6 | 3 |
|        | elevation of cytosolic calcium ion concentration | cytosolic calcium ion homeostasis                         | 6 | 3 |
|        | elevation of cytosolic calcium ion concentration | cellular calcium ion homeostasis                          | 6 | 3 |
|        | elevation of cytosolic calcium ion concentration | positive regulation of calcium ion transport into cytosol | 6 | 3 |
|        | elevation of cytosolic calcium ion concentration | regulation of membrane potential                          | 6 | 3 |
|        | NF-kappaB cascade                                | intracellular protein kinase cascade                      | 5 | 3 |
|        | prostanoid metabolic process                     | fatty acid metabolic process                              | 5 | 3 |
|        | negative regulation of cell proliferation        | regulation of cell proliferation                          | 5 | 3 |
|        | negative regulation of cell proliferation        | cell proliferation                                        | 5 | 3 |
|        | xenobiotic metabolic process                     | xenobiotic metabolic process                              | 5 | 3 |
|        | hydrogen peroxide catabolic process              | cellular response to reactive oxygen species              | 5 | 3 |
|        | anti-apoptosis                                   | positive regulation of anti-apoptosis                     | 5 | 3 |
|        | regulation of insulin secretion                  | negative regulation of insulin secretion                  | 5 | 3 |
|        | ERK1 and ERK2 cascade                            | MAPKKK cascade                                            | 5 | 4 |
| CD&CRC | response to peptide hormone stimulus             | cellular response to hormone stimulus                     | 6 | 3 |
|        | wound healing                                    | platelet activation                                       | 6 | 3 |
|        | response to wounding                             | platelet activation                                       | 6 | 3 |
|        | negative regulation of cell proliferation        | regulation of cell proliferation                          | 6 | 3 |
|        | negative regulation of cell proliferation        | cell proliferation                                        | 6 | 3 |
|        | JAK-STAT cascade                                 | intracellular protein kinase cascade                      | 5 | 3 |
|        | response to hydrogen                             | cellular response to reactive                             | 5 | 3 |

|                                                          |                                                           |   |   |
|----------------------------------------------------------|-----------------------------------------------------------|---|---|
| peroxide                                                 | oxygen species                                            |   |   |
| anti-apoptosis                                           | positive regulation of anti-apoptosis                     | 5 | 3 |
| cellular response to starvation                          | response to starvation                                    | 5 | 3 |
| positive regulation of cell proliferation                | regulation of cell proliferation                          | 5 | 3 |
| positive regulation of cell proliferation                | cell proliferation                                        | 5 | 3 |
| cytokine-mediated signaling pathway                      | cellular response to hormone stimulus                     | 5 | 3 |
| platelet activation                                      | platelet activation                                       | 4 | 3 |
| blood coagulation                                        | platelet activation                                       | 4 | 3 |
| positive regulation of endothelial cell proliferation    | negative regulation of endothelial cell proliferation     | 4 | 3 |
| response to insulin stimulus                             | cellular response to hormone stimulus                     | 4 | 3 |
| cellular response to hydrogen peroxide                   | cellular response to reactive oxygen species              | 4 | 3 |
| response to inorganic substance                          | cellular response to reactive oxygen species              | 4 | 3 |
| cell-cell signaling                                      | signal transduction                                       | 4 | 3 |
| hydrogen peroxide catabolic process                      | cellular response to reactive oxygen species              | 4 | 3 |
| fatty acid biosynthetic process                          | fatty acid metabolic process                              | 4 | 3 |
| positive regulation of peptidyl-tyrosine phosphorylation | peptidyl-tyrosine phosphorylation                         | 4 | 3 |
| calcium ion homeostasis                                  | cytosolic calcium ion homeostasis                         | 4 | 3 |
| calcium ion homeostasis                                  | cellular calcium ion homeostasis                          | 4 | 3 |
| calcium ion homeostasis                                  | positive regulation of calcium ion transport into cytosol | 4 | 3 |
| calcium ion homeostasis                                  | regulation of membrane potential                          | 4 | 3 |
| positive regulation of cell division                     | cell division                                             | 4 | 3 |
| NF-kappaB cascade                                        | intracellular protein kinase cascade                      | 4 | 3 |

**Note:** Term name1 represents the terms enriched in the first disease (for example, CD for CD&UC), and the No.1 is the corresponding number of enriched datasets. Term name2 and No.2 correspond to the other disease (UC for CD&UC). The term pairs have the similarity score larger than 0.8.

**Table S2. The list of consensus KEGG pathways among CD, UC and CRC**

| classes | Functional category                       | KEGG pathway name                            | No. total | No. UC | No. CD/CRC |
|---------|-------------------------------------------|----------------------------------------------|-----------|--------|------------|
| CD&UC   | Signaling Molecules and Interaction       | Cytokine-cytokine receptor interaction       | 14        | 8      | 6          |
|         | Infectious Diseases                       | Pertussis                                    | 15        | 8      | 7          |
|         | Infectious Diseases                       | Leishmaniasis                                | 13        | 7      | 6          |
|         | Infectious Diseases                       | Malaria                                      | 12        | 6      | 6          |
|         | Immune System Diseases                    | Rheumatoid arthritis                         | 13        | 7      | 6          |
|         | Infectious Diseases                       | Staphylococcus aureus infection              | 11        | 6      | 5          |
|         | Infectious Diseases                       | Tuberculosis                                 | 10        | 5      | 5          |
|         | Infectious Diseases                       | Toxoplasmosis                                | 10        | 5      | 5          |
|         | Infectious Diseases                       | African trypanosomiasis                      | 11        | 6      | 5          |
|         | Infectious Diseases                       | Chagas disease                               | 10        | 6      | 4          |
|         | Immune System                             | NOD-like receptor signaling pathway          | 12        | 7      | 5          |
|         | Immune System                             | Complement and coagulation cascades          | 10        | 5      | 5          |
|         | Immune System                             | Chemokine signaling pathway                  | 13        | 8      | 5          |
|         | Immune System                             | Antigen processing and presentation          | 9         | 5      | 4          |
|         | Development                               | Osteoclast differentiation                   | 11        | 7      | 4          |
|         | Immune System                             | Toll-like receptor signaling pathway         | 11        | 7      | 4          |
| UC&CRC  | Xenobiotics Biodegradation and Metabolism | Drug metabolism - cytochrome P450            | 10        | 6      | 4          |
|         | Xenobiotics Biodegradation and Metabolism | Metabolism of xenobiotics by cytochrome P450 | 8         | 5      | 3          |
|         | Metabolism of Cofactors and Vitamins      | Retinol metabolism                           | 9         | 5      | 4          |
|         | Excretory System                          | Proximal tubule bicarbonate reclamation      | 8         | 5      | 3          |
|         | Immune System                             | Intestinal immune network for IgA production | 8         | 5      | 3          |

**Note:** CD&UC represents CD and UC, likewise UC&CRC represents UC and CRC. The last three columns display the number of significantly enriched datasets, "No" represents the number. In the last column, No.CD is used for the first class, whereas No.CRC is used for the second.

**Table S3. The PubMed citation information of risk miRNAs and corresponding diseases.**

| <b>Class</b> | <b>miRNA</b>            | <b>Relation</b>            | <b>First authors</b>                    | <b>Refs</b>       |
|--------------|-------------------------|----------------------------|-----------------------------------------|-------------------|
| <b>CRC</b>   | miR-124                 | colorectal cancer          | Zhang Y; Zhang J; Sun Y; Liu K          | 1-4               |
|              | miR-146a                | colorectal cancer          | Mao Y; Du W; Hwang WL; Wan D            | 5-8               |
|              | miR-26b                 | colorectal cancer          | Ma YL; Zhang C                          | 9, 10             |
|              | miR-335                 | colorectal cancer          | Vickers MM; Wang YX                     | 11, 12            |
|              | miR-125b                | colorectal cancer          | Nishida N; Ak S; Gong J; Lin M          | 13-16             |
|              | let-7g                  | colorectal cancer          | Wang J; Xi Y; Salendo J                 | 17-19             |
|              | miR-122                 | colorectal cancer          | Iino I; Kunte DP; Kanaan Z              | 20-22             |
|              | miR-124a                | colorectal cancer          | Deng G; Nakano H                        | 23, 24            |
|              | miR-15a                 | colorectal cancer          | Shi L; Dai L; Wang X                    | 25-27             |
|              | miR-16                  | colorectal cancer          | Qian J; Shi L; Ma Q; Young LE           | 25, 28-30         |
|              | miR-192                 | colorectal cancer          | Chiang Y; Boni V; Yu XF; Balaguer F     | 31-34             |
|              | miR-212                 | colorectal cancer          | Meng X                                  | 35                |
|              | miR-34b*                | colorectal cancer          | Oh J;; Wu XD; Gao LB<br>Kalimutho M     | 36-39             |
|              | miR-34c                 | colorectal cancer          | Toyota M; Gao LB; Wu XD;<br>Kalimutho M | 37-40             |
|              | miR-424                 | colorectal cancer          | Wang S; Guo ST; Wang X;<br>Wang YX      | 12, 27,<br>41, 42 |
|              | miR-449a                | colorectal cancer          | Chen S; Rudolf E                        | 43, 44            |
|              | miR-449b                | colorectal cancer          | Fang Y                                  | 45                |
|              | miR-503                 | colorectal cancer          | Kunte DP                                | 21                |
|              | miR-217                 | gastrointestinal cancer    | Stuckenholz C                           | 46                |
|              | miR-193b                | gastrointestinal cancer    | Du Y                                    | 47                |
| miR-425      | gastrointestinal cancer | Hummel R                   | 48                                      |                   |
| miR-302a     | predicted               |                            |                                         |                   |
| <b>CD</b>    | miR-146a                | Crohn's disease            | Lin J; Gazouli M                        | 49, 50            |
|              | miR-126                 | Crohn's disease            | Paraskevi A                             | 51                |
|              | miR-29a                 | Crohn's disease            | Paraskevi A                             | 51                |
|              | miR-206                 | Crohn's disease            | Lin J                                   | 49                |
|              | miR-29b                 | Crohn's disease            | Nijhuis A                               | 52                |
|              | miR-29c                 | Crohn's disease            | Nijhuis A                               | 52                |
|              | miR-221                 | Crohn's disease            | Fujioka S                               | 53                |
|              | miR-21                  | Crohn's disease            | Ludwig K; Sohn JJ                       | 54, 55            |
|              | miR-338                 | inflammatory bowel disease | Dalal SR                                | 56                |
|              | miR-155                 | inflammation               | Wu R                                    | 57                |

|           |             |                    |                             |            |
|-----------|-------------|--------------------|-----------------------------|------------|
|           | miR-520c    | inflammation       | Keklikoglou I               | 58         |
|           | miR-939     | inflammation       | Semaan N                    | 59         |
|           | miR-335     | inflammation       | Zhu L                       | 60         |
|           | miR-1       | inflammation       | Georgantas RW               | 61         |
|           | miR-204     | inflammation       | Li G                        | 62         |
|           | miR-222     | inflammation       | Dentelli P                  | 63         |
|           | miR-20a     | inflammation       | Zhu D                       | 64         |
|           | miR-365     | inflammation       | Ha TY.                      | 65         |
|           | miR-217     | inflammation       | Dinh H                      | 66         |
|           | mir-221/222 | inflammation       | Zhu N                       | 67         |
|           | miR-451     | inflammation       | Podolska A                  | 68         |
|           | miR-19a     | ulcerative colitis | Chen B                      | 69         |
|           | miR-124     | ulcerative colitis | Koukos G                    | 70         |
|           | miR-26b     | ulcerative colitis | Coskun M                    | 71         |
|           | miR-98      | ulcerative colitis | Coskun M                    | 71         |
|           | miR-105     | ulcerative colitis | Coskun M                    | 71         |
|           | miR-20b     | ulcerative colitis | Coskun M                    | 71         |
|           | miR-512-5p  | predicted          |                             |            |
|           | miR-570c    | predicted          |                             |            |
| <b>UC</b> | miR-124     | ulcerative colitis | Koukos G                    | 70         |
|           | miR-146a    | ulcerative colitis | Lin J                       | 49         |
|           | miR-26b     | ulcerative colitis | Coskun M                    | 71         |
|           | miR-126     | ulcerative colitis | Feng X                      | 72         |
|           | miR-155     | ulcerative colitis | Min M;Takagi T; Paraskevi A | 51, 73, 74 |
|           | miR-98      | ulcerative colitis | Coskun M                    | 71         |
|           | miR-1       | inflammation       | Georgantas RW               | 61         |
|           | miR-204     | inflammation       | Li G                        | 62         |
|           | miR-125b    | inflammation       | Wang Z                      | 75         |
|           | mir-221/222 | inflammation       | Zhu N                       | 67         |
|           | miR-451     | inflammation       | Podolska A                  | 68         |
|           | miR-335     | inflammation       | Zhu L                       | 60         |
|           | miR-29a     | Crohn's disease    | Paraskevi A                 | 51         |
|           | miR-222     | colorectal cancer  | Xu K                        | 76         |
|           | miR-346     | predicted          |                             |            |

## References

1. Y. Zhang, L. Zheng, J. Huang, F. Gao, X. Lin, L. He, D. Li, Z. Li, Y. Ding and L. Chen, *PloS one*, 2014, 9, e93917.
2. J. Zhang, Y. Lu, X. Yue, H. Li, X. Luo, Y. Wang, K. Wang and J. Wan, *PloS one*, 2013, 8, e70300.
3. Y. Sun, X. Zhao, M. Luo, Y. Zhou, W. Ren, K. Wu, X. Li, J. Shen and Y. Hu, *International journal of molecular sciences*, 2014, 15, 4318-4332.
4. K. Liu, H. Zhao, H. Yao, S. Lei, Z. Lei, T. Li and H. Qi, *BioMed research international*, 2013, 2013, 867537.
5. Y. Mao, Y. Li, F. Jing, S. Cai, Z. Zhang, Q. Li, X. Ma, J. Wang, M. Jin and K. Chen, *Tumour biology : the journal of the International Society for Onco developmental Biology and Medicine*, 2014, DOI: 10.1007/s13277-014-1916-y.
6. W. Du, X. L. Ma, C. Zhao, T. Liu, Y. L. Du, W. Q. Kong, B. L. Wei, J. Y. Yu, Y. Y. Li, J. W. Huang, Z. K. Li and L. Liu, *Asian Pacific journal of cancer prevention : APJCP*, 2014, 15, 1047-1055.
7. W. L. Hwang, J. K. Jiang, S. H. Yang, T. S. Huang, H. Y. Lan, H. W. Teng, C. Y. Yang, Y. P. Tsai, C. H. Lin, H. W. Wang and M. H. Yang, *Nature cell biology*, 2014, 16, 268-280.
8. D. Wan, W. Gu, G. Xu, C. Shen, D. Ding, S. Shen, S. Wang, X. Gong, S. He and Q. Zhi, *Clinical & translational oncology : official publication of the Federation of Spanish Oncology Societies and of the National Cancer Institute of Mexico*, 2014, DOI: 10.1007/s12094-013-1150-x.
9. Y. L. Ma, P. Zhang, F. Wang, M. P. Moyer, J. J. Yang, Z. H. Liu, J. Y. Peng, H. Q. Chen, Y. K. Zhou, W. J. Liu and H. L. Qin, *Journal of cellular and molecular medicine*, 2011, 15, 1941-1954.
10. C. Zhang, J. Tong and G. Huang, *PloS one*, 2013, 8, e69963.
11. M. M. Vickers, J. Bar, I. Gorn-Hondermann, N. Yarom, M. Daneshmand, J. E. Hanson, C. L. Addison, T. R. Asmis, D. J. Jonker, J. Maroun, I. A. Lorimer, G. D. Goss and J. Dimitroulakos, *Clinical & experimental metastasis*, 2012, 29, 123-132.
12. Y. X. Wang, X. Y. Zhang, B. F. Zhang, C. Q. Yang, X. M. Chen and H. J. Gao, *Journal of digestive diseases*, 2010, 11, 50-54.
13. N. Nishida, T. Yokobori, K. Mimori, T. Sudo, F. Tanaka, K. Shibata, H. Ishii, Y. Doki, H. Kuwano and M. Mori, *International journal of oncology*, 2011, 38, 1437-1443.
14. S. Ak, B. Tunca, G. Tezcan, G. Cecener, U. Egeli, T. Yilmazlar, E. Ozturk and O. Yerci, *The Journal of surgical research*, 2014, DOI: 10.1016/j.jss.2014.03.057.
15. J. Gong, J. P. Zhang, B. Li, C. Zeng, K. You, M. X. Chen, Y. Yuan and S. M. Zhuang, *Oncogene*, 2013, 32, 3071-3079.
16. M. Lin, W. Chen, J. Huang, H. Gao, Y. Ye, Z. Song and X. Shen, *Oncology reports*, 2011, 25, 739-747.
17. J. Wang, S. K. Huang, M. Zhao, M. Yang, J. L. Zhong, Y. Y. Gu, H. Peng, Y. Q. Che and C. Z. Huang, *PloS one*, 2014, 9, e87451.
18. Y. Xi, A. Formentini, M. Chien, D. B. Weir, J. J. Russo, J. Ju, M. Kornmann and J. Ju, *Biomarker insights*, 2006, 2, 113-121.



19. J. Salendo, M. Spitzner, F. Kramer, X. Zhang, P. Jo, H. A. Wolff, J. Kitz, S. Kaulfuss, T. Beissbarth, M. Dobbstein, M. Ghadimi, M. Grade and J. Gaedcke, *Radiotherapy and oncology : journal of the European Society for Therapeutic Radiology and Oncology*, 2013, 108, 451-457.
20. I. Iino, H. Kikuchi, S. Miyazaki, Y. Hiramatsu, M. Ohta, K. Kamiya, Y. Kusama, S. Baba, M. Setou and H. Konno, *Cancer science*, 2013, 104, 624-630.
21. D. P. Kunte, M. Delacruz, R. K. Wali, A. Menon, H. Du, Y. Stypula, A. Patel, V. Backman and H. K. Roy, *PloS one*, 2012, 7, e45591.
22. Z. Kanaan, S. N. Rai, M. R. Eichenberger, C. Barnes, A. M. Dworkin, C. Weller, E. Cohen, H. Roberts, B. Keskey, R. E. Petras, N. P. Crawford and S. Galandiuk, *Human mutation*, 2012, 33, 551-560.
23. G. Deng, S. Kakar and Y. S. Kim, *Oncology letters*, 2011, 2, 175-180.
24. H. Nakano, T. Miyazawa, K. Kinoshita, Y. Yamada and T. Yoshida, *International journal of cancer. Journal international du cancer*, 2010, 127, 1072-1080.
25. L. Shi, R. Jackstadt, H. Siemens, H. Li, T. Kirchner and H. Hermeking, *Cancer research*, 2014, 74, 532-542.
26. L. Dai, W. Wang, S. Zhang, Q. Jiang, R. Wang, L. Dai, L. Cheng, Y. Yang, Y. Q. Wei and H. X. Deng, *Cell biology international*, 2012, 36, 765-770.
27. X. Wang, J. Wang, H. Ma, J. Zhang and X. Zhou, *Medical oncology*, 2012, 29, 919-927.
28. J. Qian, B. Jiang, M. Li, J. Chen and M. Fang, *World journal of surgery*, 2013, 37, 2944-2949.
29. Q. Ma, X. Wang, Z. Li, B. Li, F. Ma, L. Peng, Y. Zhang, A. Xu and B. Jiang, *Oncology reports*, 2013, 29, 1652-1658.
30. L. E. Young, A. E. Moore, L. Sokol, N. Meisner-Kober and D. A. Dixon, *Molecular cancer research : MCR*, 2012, 10, 167-180.
31. Y. Chiang, Y. Song, Z. Wang, Z. Liu, P. Gao, J. Liang, J. Zhu, C. Xing and H. Xu, *Experimental and therapeutic medicine*, 2012, 3, 560-566.
32. V. Boni, N. Bitarte, I. Cristobal, R. Zarate, J. Rodriguez, E. Maiello, J. Garcia-Foncillas and E. Bandres, *Molecular cancer therapeutics*, 2010, 9, 2265-2275.
33. X. F. Yu, J. Zou, Z. J. Bao and J. Dong, *World journal of gastroenterology : WJG*, 2011, 17, 4711-4717.
34. F. Balaguer, L. Moreira, J. J. Lozano, A. Link, G. Ramirez, Y. Shen, M. Cuatrecasas, M. Arnold, S. J. Meltzer, S. Syngal, E. Stoffel, R. Jover, X. Llor, A. Castells, C. R. Boland, M. Gironella and A. Goel, *Clinical cancer research : an official journal of the American Association for Cancer Research*, 2011, 17, 6239-6249.
35. X. Meng, J. Wu, C. Pan, H. Wang, X. Ying, Y. Zhou, H. Yu, Y. Zuo, Z. Pan, R. Y. Liu and W. Huang, *Gastroenterology*, 2013, 145, 426-436 e421-426.
36. J. Oh, J. W. Kim, B. E. Lee, M. J. Jang, S. Y. Chong, P. W. Park, S. G. Hwang, D. Oh and N. K. Kim, *Oncology reports*, 2014, 31, 995-1002.
37. X. D. Wu, Y. C. Song, P. L. Cao, H. Zhang, Q. Guo, R. Yan, D. M. Diao, Y. Cheng and C. X. Dang, *Medical oncology*, 2014, 31, 894.
38. L. B. Gao, L. J. Li, X. M. Pan, Z. H. Li, W. B. Liang, P. Bai, Y. H. Zhu and L. Zhang, *Biological chemistry*, 2013, 394, 415-420.
39. M. Kalimutho, S. Di Cecilia, G. Del Vecchio Blanco, F. Roviello, P. Sileri, M. Cretella,

- A. Formosa, G. Corso, D. Marrelli, F. Pallone, G. Federici and S. Bernardini, *British journal of cancer*, 2011, 104, 1770-1778.
40. M. Toyota, H. Suzuki, Y. Sasaki, R. Maruyama, K. Imai, Y. Shinomura and T. Tokino, *Cancer research*, 2008, 68, 4123-4132.
41. S. Wang, L. Wang, N. Bayaxi, J. Li, W. Verhaegh, A. Janevski, V. Varadan, Y. Ren, D. Merkle, X. Meng, X. Gao, H. Wang, J. Ren, W. P. Kuo, N. Dimitrova, Y. Wu and H. Zhu, *Gut*, 2013, 62, 280-289.
42. S. T. Guo, C. C. Jiang, G. P. Wang, Y. P. Li, C. Y. Wang, X. Y. Guo, R. H. Yang, Y. Feng, F. H. Wang, H. Y. Tseng, R. F. Thorne, L. Jin and X. D. Zhang, *Oncogene*, 2013, 32, 1910-1920.
43. S. Chen, Y. Dai, X. Zhang, D. Jin, X. Li and Y. Zhang, *Oncology letters*, 2014, 7, 568-572.
44. E. Rudolf, S. John and M. Cervinka, *Toxicology letters*, 2012, 214, 1-8.
45. Y. Fang, X. Gu, Z. Li, J. Xiang and Z. Chen, *Oncology reports*, 2013, 30, 399-406.
46. C. Stuckenholz, L. Lu, P. Thakur, N. Kaminski and N. Bahary, *Gastroenterology*, 2009, 137, 1321-1332.
47. Y. Du, Z. Liu, L. Gu, J. Zhou, B. D. Zhu, J. Ji and D. Deng, *BMC cancer*, 2012, 12, 249.
48. R. Hummel, T. Wang, D. I. Watson, M. Z. Michael, M. Van der Hoek, J. Haier and D. J. Hussey, *Oncology reports*, 2011, 26, 1011-1017.
49. J. Lin, N. C. Welker, Z. Zhao, Y. Li, J. Zhang, S. A. Reuss, X. Zhang, H. Lee, Y. Liu and M. P. Bronner, *Modern pathology : an official journal of the United States and Canadian Academy of Pathology, Inc*, 2014, 27, 602-608.
50. M. Gazouli, I. Papaconstantinou, K. Stamatis, A. Vaiopoulou, C. Zeglinas, I. Vassiliou, G. Giokas and C. Tzathas, *Digestive diseases and sciences*, 2013, 58, 2324-2328.
51. A. Paraskevi, G. Theodoropoulos, I. Papaconstantinou, G. Mantzaris, N. Nikiteas and M. Gazouli, *Journal of Crohn's & colitis*, 2012, 6, 900-904.
52. A. Nijhuis, P. Biancheri, A. Lewis, C. L. Bishop, P. Giuffrida, C. Chan, R. M. Feakins, R. Poulson, A. Di Sabatino, G. R. Corazza, T. T. Macdonald, J. O. Lindsay and A. R. Silver, *Clinical science*, 2014, DOI: 10.1042/CS20140048.
53. S. Fujioka, I. Nakamichi, M. Esaki, K. Asano, T. Matsumoto and T. Kitazono, *Journal of gastroenterology and hepatology*, 2014, DOI: 10.1111/jgh.12523.
54. K. Ludwig, M. Fassan, C. Mescoli, M. Pizzi, M. Balistreri, L. Albertoni, S. Pucciarelli, M. Scarpa, G. C. Sturniolo, I. Angriman and M. Rugge, *Virchows Archiv : an international journal of pathology*, 2013, 462, 57-63.
55. J. J. Sohn, A. J. Schetter, H. G. Yfantis, L. A. Ridnour, I. Horikawa, M. A. Khan, A. I. Robles, S. P. Hussain, A. Goto, E. D. Bowman, L. J. Hofseth, J. Bartkova, J. Bartek, G. N. Wogan, D. A. Wink and C. C. Harris, *PloS one*, 2012, 7, e44156.
56. S. R. Dalal and J. H. Kwon, *Gastroenterology & hepatology*, 2010, 6, 714-722.
57. R. Wu, Y. Li, Z. Guo, J. Gong, W. Zhu, N. Li and J. Li, *Molecular immunology*, 2013, 56, 340-346.
58. I. Keklikoglou, C. Koerner, C. Schmidt, J. D. Zhang, D. Heckmann, A. Shavinskaya, H. Allgayer, B. Guckel, T. Fehm, A. Schneeweiss, O. Sahin, S. Wiemann and U. Tschulena, *Oncogene*, 2012, 31, 4150-4163.
59. N. Semaan, L. Frenzel, G. Alsaleh, G. Suffert, J. E. Gottenberg, J. Sibia, S. Pfeffer and

- D. Wachsmann, *PloS one*, 2011, 6, e19827.
60. L. Zhu, L. Chen, C. M. Shi, G. F. Xu, L. L. Xu, L. L. Zhu, X. R. Guo, Y. Ni, Y. Cui and C. Ji, *Cell biochemistry and biophysics*, 2014, 68, 283-290.
61. R. W. Georgantas, K. Streicher, S. A. Greenberg, L. Greenlees, W. Zhu, P. Brohawn, B. W. Higgs, M. Czapiga, C. Morehouse, A. Amato, L. Richman, B. Jallal, Y. Yao and K. Ranade, *Arthritis and rheumatism*, 2013, DOI: 10.1002/art.38292.
62. G. Li, C. Luna, J. Qiu, D. L. Epstein and P. Gonzalez, *Investigative ophthalmology & visual science*, 2011, 52, 2999-3007.
63. P. Dentelli, A. Rosso, F. Orso, C. Olgasi, D. Taverna and M. F. Brizzi, *Arteriosclerosis, thrombosis, and vascular biology*, 2010, 30, 1562-1568.
64. D. Zhu, C. Pan, L. Li, Z. Bian, Z. Lv, L. Shi, J. Zhang, D. Li, H. Gu, C. Y. Zhang, Y. Liu and K. Zen, *The Journal of allergy and clinical immunology*, 2013, 132, 426-436 e428.
65. T. Y. Ha, *Immune network*, 2011, 11, 227-244.
66. H. Dinh, Y. H. Hong and H. S. Lillehoj, *Veterinary immunology and immunopathology*, 2014, 159, 74-82.
67. N. Zhu, D. Zhang, S. Chen, X. Liu, L. Lin, X. Huang, Z. Guo, J. Liu, Y. Wang, W. Yuan and Y. Qin, *Atherosclerosis*, 2011, 215, 286-293.
68. A. Podolska, C. Anthon, M. Bak, N. Tommerup, K. Skovgaard, P. M. Heegaard, J. Gorodkin, S. Cirera and M. Fredholm, *BMC genomics*, 2012, 13, 459.
69. B. Chen, S. She, D. Li, Z. Liu, X. Yang, Z. Zeng and F. Liu, *Scandinavian journal of gastroenterology*, 2013, 48, 815-824.
70. G. Koukos, C. Polytarchou, J. L. Kaplan, A. Morley-Fletcher, B. Gras-Miralles, E. Kokkotou, M. Baril-Dore, C. Pothoulakis, H. S. Winter and D. Iliopoulos, *Gastroenterology*, 2013, 145, 842-852 e842.
71. M. Coskun, J. T. Bjerrum, J. B. Seidelin, J. T. Troelsen, J. Olsen and O. H. Nielsen, *World journal of gastroenterology : WJG*, 2013, 19, 4289-4299.
72. X. Feng, H. Wang, S. Ye, J. Guan, W. Tan, S. Cheng, G. Wei, W. Wu, F. Wu and Y. Zhou, *PloS one*, 2012, 7, e52782.
73. T. Takagi, Y. Naito, K. Mizushima, I. Hirata, N. Yagi, N. Tomatsuri, T. Ando, Y. Oyamada, Y. Isozaki, H. Hongo, K. Uchiyama, O. Handa, S. Kokura, H. Ichikawa and T. Yoshikawa, *Journal of gastroenterology and hepatology*, 2010, 25 Suppl 1, S129-133.
74. M. Min, L. Peng, Y. Yang, M. Guo, W. Wang and G. Sun, *Inflammatory bowel diseases*, 2014, 20, 652-659.
75. Z. Wang, L. R. Filgueiras, S. Wang, A. P. Serezani, M. Peters-Golden, S. Jancar and C. H. Serezani, *Journal of immunology*, 2014, 192, 2349-2356.
76. K. Xu, X. Liang, K. Shen, L. Sun, D. Cui, Y. Zhao, J. Tian, L. Ni and J. Liu, *Experimental cell research*, 2012, 318, 2168-2177.
